# Supplementary material for: In Vitro and In Vivo Biological Activity of Ruthenium 1,10-Phenanthroline-5,6-dione Arene Complexes
Source: MDPI journal article supplement (doi:10.3390/ijms232113594), 2022-11-06
Supplement: s1 [file s1]

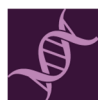

Article

# In Vitro and In Vivo Biological Activity of Ruthenium 1,10-Phenanthroline-5,6-dione Arene Complexes

Oscar A. Lenis-Rojas <sup>1,\*</sup>, Catarina Roma-Rodrigues <sup>2,3</sup>, Beatriz Carvalho <sup>2,3</sup>, Pablo Cabezas-Sainz <sup>4</sup>, Sabela Fernández Vila <sup>4</sup>, Laura Sánchez <sup>4,5</sup>, Pedro V. Baptista <sup>2,3</sup>, Alexandra R. Fernandes <sup>2,3,\*</sup> and Beatriz Royo <sup>1</sup>

<sup>1</sup> ITQB NOVA, Instituto de Tecnologia Química e Biológica António Xavier, Universidade Nova de Lisboa, Av. da República, 2780-157 Oeiras, Portugal

<sup>2</sup> Associate Laboratory i4HB—Institute for Health and Bioeconomy, NOVA School of Science and Technology, NOVA University Lisbon, 2819-516 Caparica, Portugal

<sup>3</sup> UCIBIO—Applied Molecular Biosciences Unit, Department of Life Sciences, NOVA School of Science and Technology, NOVA University Lisbon, 2819-516 Caparica, Portugal

<sup>4</sup> Departamento de Zoología Genética y Antropología Física, Facultad de Veterinaria, Universidad de Santiago de Compostela, Campus de Lugo, 27002 Lugo, Spain

<sup>5</sup> Preclinical Animal Models Group, Health Research Institute of Santiago de Compostela (IDIS), 15706 Santiago de Compostela, Spain

\* Correspondence: oscar.rojas@itqb.unl.pt (O.A.L.-R.); ma.fernandes@fct.unl.pt (A.R.F.)

## Supplementary Materials

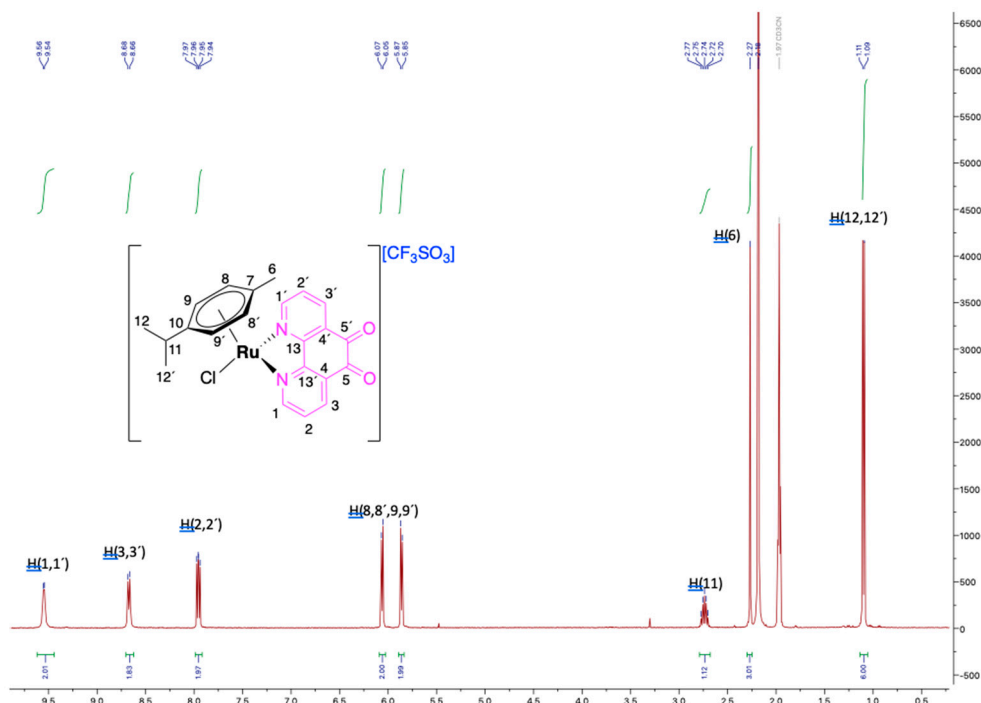

Figure S1. <sup>1</sup>H NMR spectra of JHOR10.

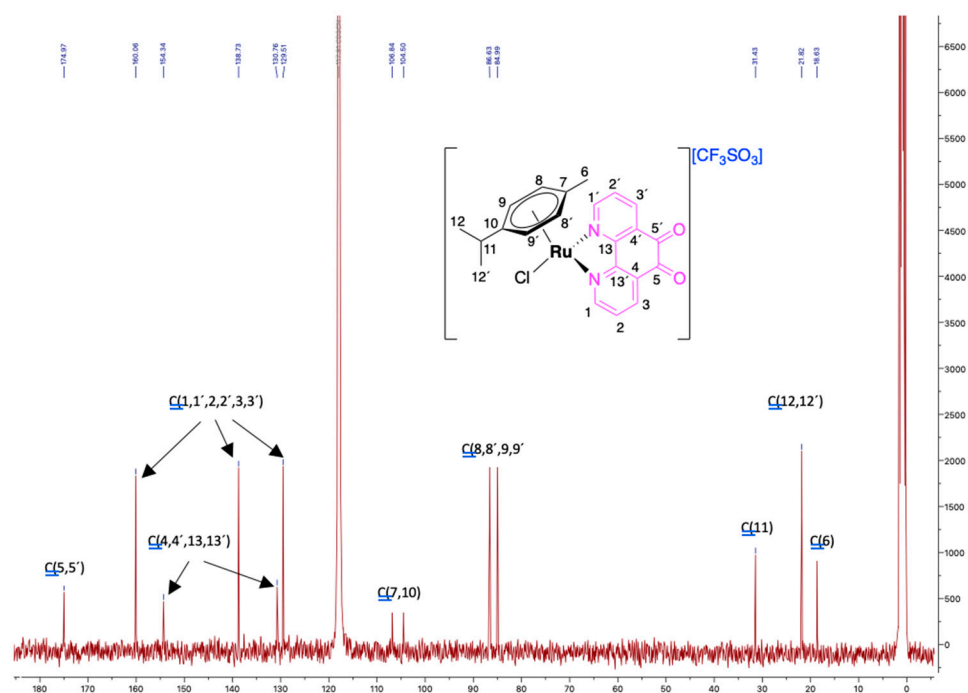Figure S2.  $^{13}\text{C}$  NMR spectra of JHOR10.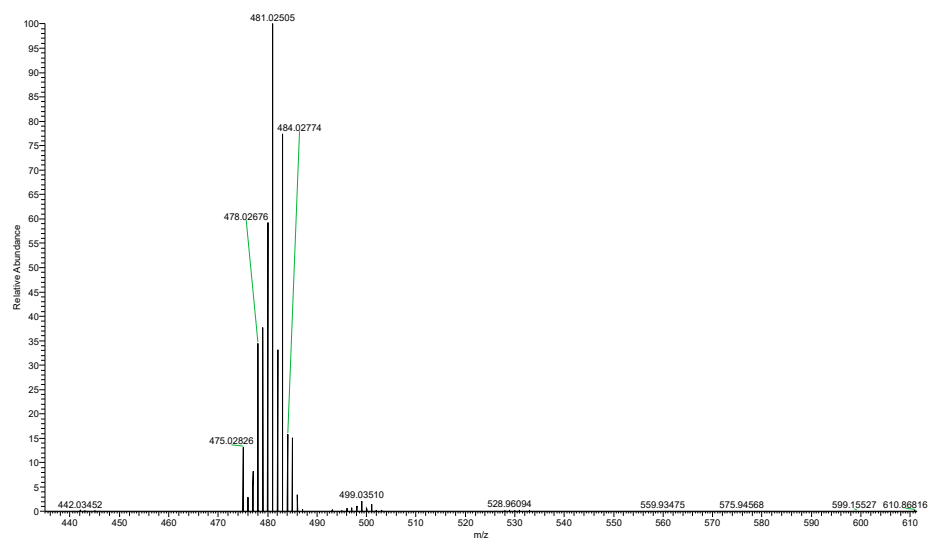

Figure S3. HRSM spectra of JHOR10.

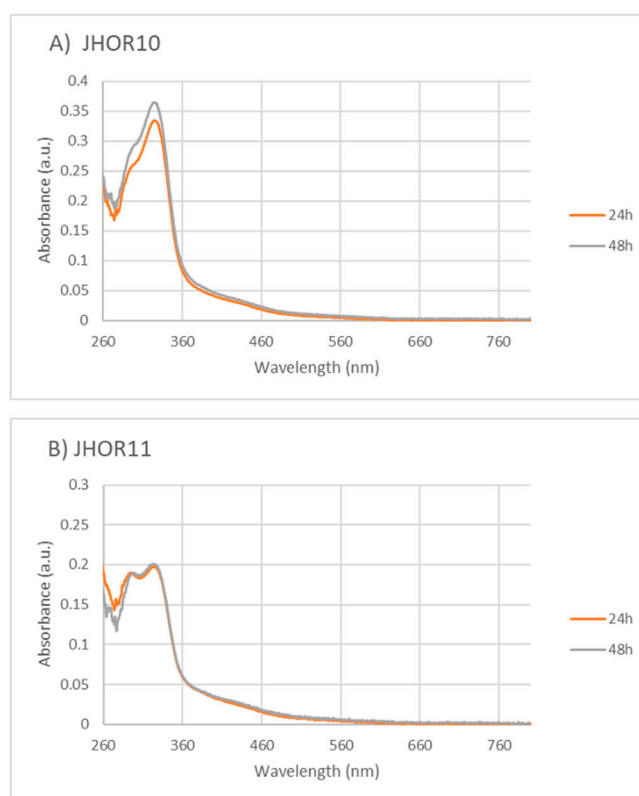

**Figure S4.** UV-visible spectra after 24h and 48h of 37°C incubation of 100  $\mu$ M complex A) JHOR10 and B) JHOR11 in cell culture medium DMEM.

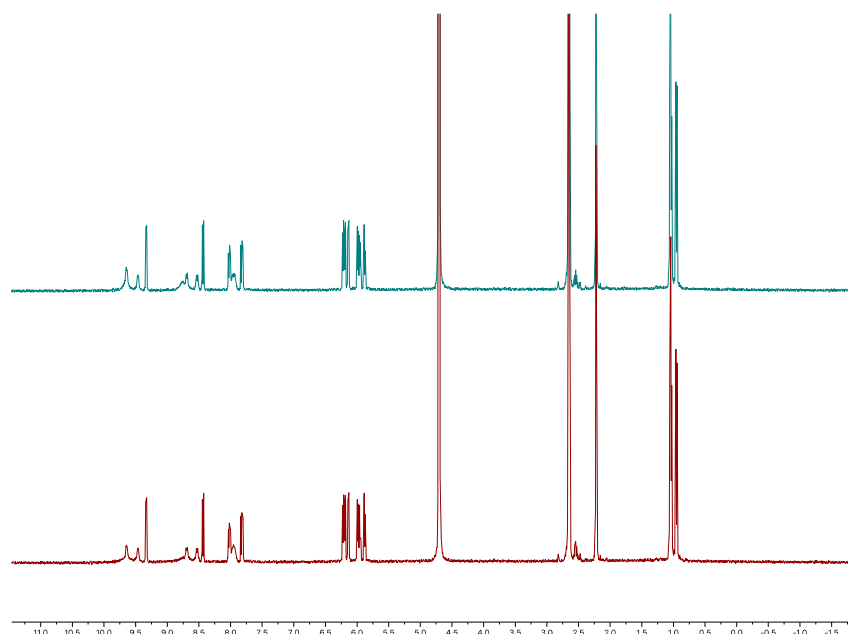

**Figure S5.** NMR spectra of JHOR11 in DMSO- $d_6$ -D $_2$ O, in a 3 : 7 (v/v) with 110 mM chloride concentration at 0h (red) and 48h (green).

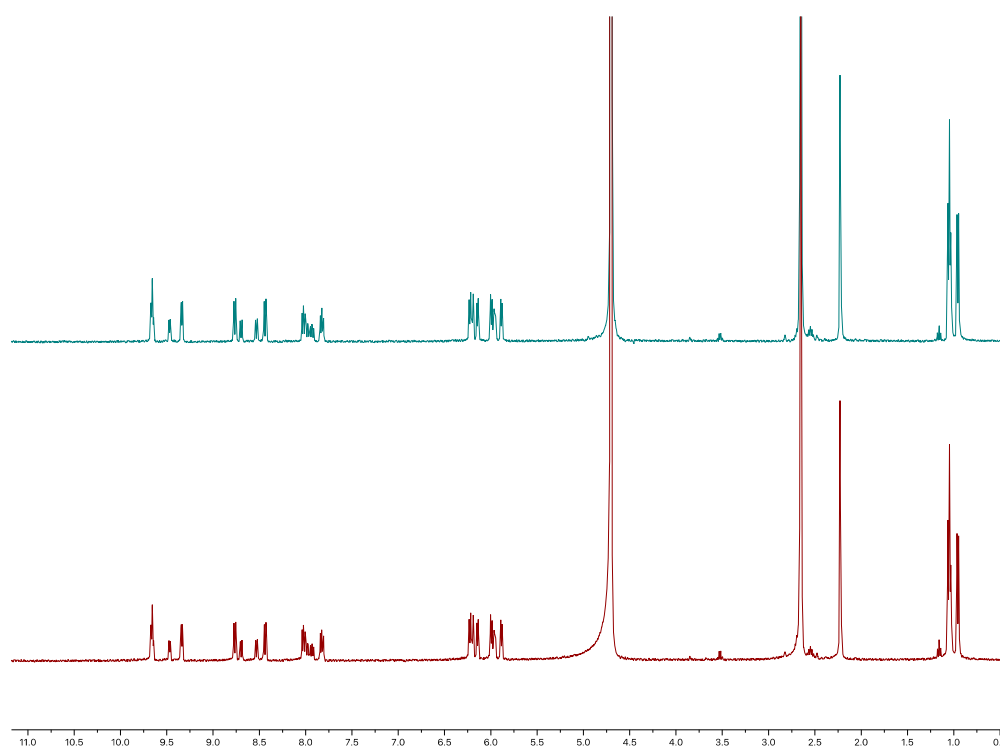

**Figure S6.** NMR spectra of JHOR10 in DMSO- $d_6$ -D $_2$ O, in a 3 : 7 (v/v) with 110 mM chloride concentration at 0h (red) and 48h (green).

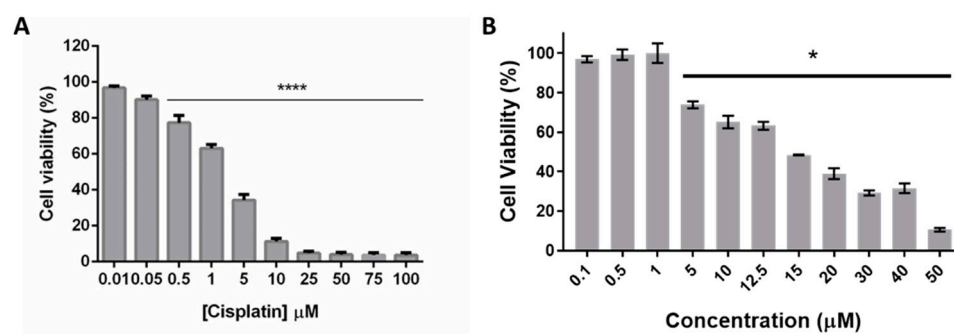

**Figure S7:** Antiproliferative activity of cisplatin after 48h in A) A2780 and B) HCT116 cell lines. Data was normalized to the control (0.1 % (v/v) DMSO) with bars representing the mean  $\pm$  SD of at least three independent experiments. \* p-value<0.05, \*\*\*\* p-value<0.0001.

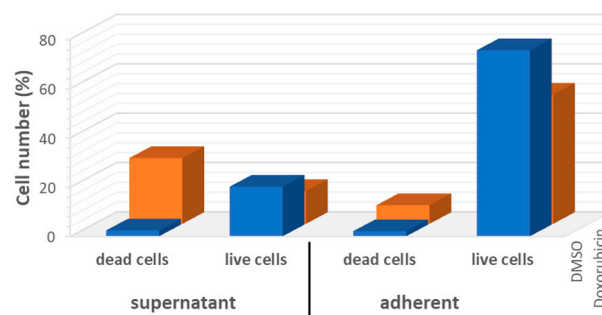

**Figure S8:** Percentage of live and dead A2780 cells in supernatant or adherent cells after 48h incubation with 0.1 % (v/v) DMSO, vector control, or 0.1  $\mu$ M doxorubicin, for positive control.
